# Supplementary material for: Mortality in patients with systemic lupus erythematosus and neuropsychiatric involvement: A retrospective analysis from a tertiary referral center in the Netherlands
Source: PubMed Central journal article supplement — Lupus. 2020 Oct 20;29(14):1892–901. doi: 10.1177/0961203320963815 (PMC7684795; doi:10.1177/0961203320963815), 2020-10-20
Supplement: sj-pdf-1-lup-10.1177_0961203320963815.pdf [file sj-pdf-1-lup-10.1177_0961203320963815.pdf]

## Supplementary material

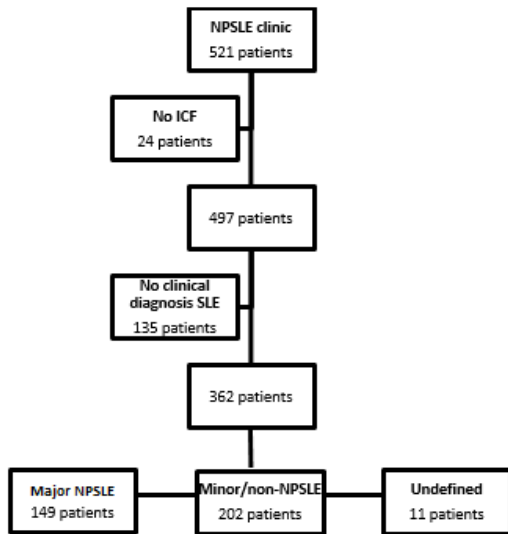

**Supplementary Figure 1** Flow chart of patients visiting NPSLE clinic between May 2007 - December 2018.

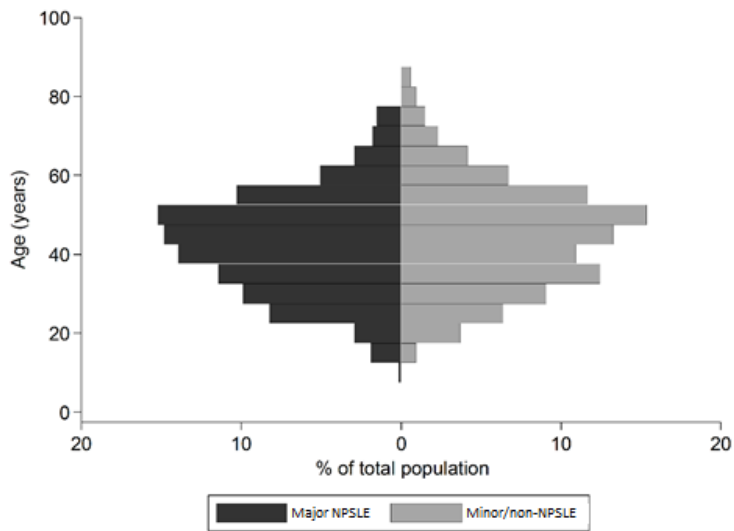

**Supplementary Figure 2** Distribution of patient years in age groups (% of total patient years) in patients with neuropsychiatric symptoms attributed to SLE requiring treatment (major NPSLE) and to mild and other causes (minor/non-NPSLE).

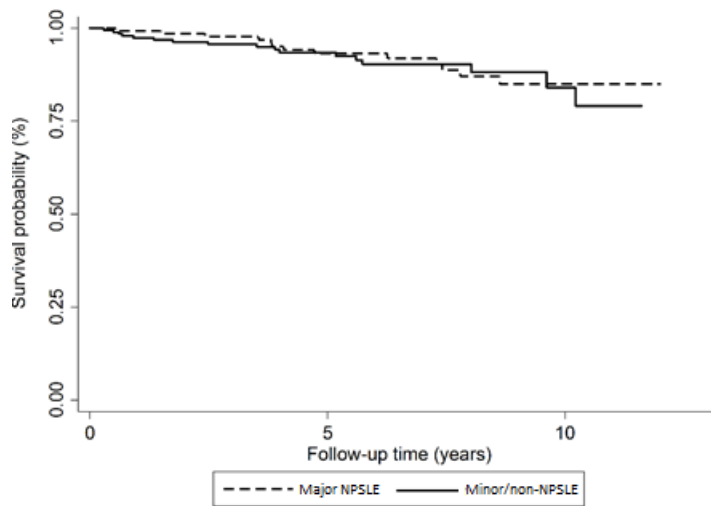

**Supplementary Figure 3** Kaplan-Meier Survival estimate for patients with neuropsychiatric symptoms attributed to SLE requiring treatment (major NPSLE) and to mild and other causes (minor/non-NPSLE).

**Supplementary Table 1** Sensitivity analysis of all-cause mortality in patients with neuropsychiatric symptoms attributed to SLE requiring treatment (major NPSLE) and to mild and other causes (minor/non-NPSLE).

|                                                                                | <i>Major NPSLE</i> | <i>Minor/non-NPSLE</i> |
|--------------------------------------------------------------------------------|--------------------|------------------------|
| All-cause mortality <sup>a</sup>                                               |                    |                        |
| General analysis                                                               | 5.0 (2.6 – 8.5)    | 3.7 (2.2 – 6.0)        |
| 1. <i>Undefined</i> patients added to subgroup <sup>b</sup>                    | 5.5 (3.2 – 8.6)    | 4.0 (2.4 – 6.3)        |
| 2. Only patients with >4 1997 ACR classification criteria <sup>c</sup>         | 5.5 (2.9 – 9.4)    | 3.5 (1.9 – 6.0)        |
| 3. Patients with NPSLE prior to baseline visit excluded from major NPSLE group | 5.5 (2.7 – 9.6)    | 3.7 (2.2 – 5.8)        |

<sup>a</sup> Standardized mortality ratio (SMR), ratio of the observed and expected number of deaths and 95% confidence intervals; <sup>b</sup> Patients with *Undefined NPSLE* added to the major NPSLE and minor/non-NPSLE group respectively;

<sup>c</sup> Patients with <4 ACR classification criteria excluded from the analyses.

**Supplementary Table 2** Age-specific standardized mortality ratios (SMRs), all-cause of SLE patients with neuropsychiatric symptoms attributed to SLE requiring treatment (major NPSLE) and to mild and other causes (minor/non-NPSLE).

| <i>Age (years) at death / end follow-up</i> | <b>Major NPSLE</b>        |                         |                   | <b>Minor/non-NPSLE</b>    |                         |                   |
|---------------------------------------------|---------------------------|-------------------------|-------------------|---------------------------|-------------------------|-------------------|
|                                             | <i>Number of patients</i> | <i>Number of deaths</i> | <i>SMR</i>        | <i>Number of patients</i> | <i>Number of deaths</i> | <i>SMR</i>        |
| 20-24                                       | 1                         | 0                       | -                 | 5                         | 1                       | 100 (2.5 – 557.2) |
| 25-34                                       | 20                        | 1                       | 20 (1.0 – 98.6)   | 24                        | 1                       | 26 (0.6 – 139.3)  |
| 35-44                                       | 27                        | 4                       | 23.5 (6.4 – 60.2) | 48                        | 1                       | 5.9 (0.1 – 32.8)  |
| 45-54                                       | 28                        | 4                       | 6.9 (1.9 – 17.7)  | 55                        | 3                       | 4.4 (0.9 – 12.9)  |
| 55-64                                       | 25                        | 2                       | 2.8 (0.3 – 10.0)  | 43                        | 4                       | 3.7 (1.0 – 9.4)   |
| 65-74                                       | 8                         | 1                       | 1.5 (0.0 – 8.3)   | 15                        | 4                       | 5.1 (1.4 – 13.1)  |
| 75-84                                       | 3                         | 1                       | 2.4 (0.1 – 13.6)  | 6                         | 2                       | 1.9 (0.2 – 6.9)   |
| 85-94                                       | 0                         | 0                       | -                 | 2                         | 1                       | 1.4 (0.0 – 7.5)   |
